# Supplementary material
Source: Royal Society of Chemistry journal article supplement (doi:10.1039/d6ta02519f)
Supplement: d6ta02519f1.pdf [file d6ta02519f1.pdf]

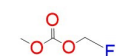

fluoromethyl methyl carbonate  
1-1

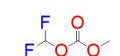

difluoromethyl methyl carbonate  
2-1

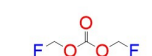

bis(fluoromethyl) carbonate  
2-2

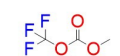

methyl (trifluoromethyl) carbonate  
3-1

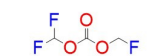

difluoromethyl (fluoromethyl) carbonate  
3-2

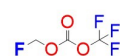

fluoromethyl (trifluoromethyl) carbonate  
4-1

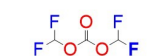

bis(difluoromethyl) carbonate  
4-2

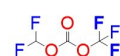

difluoromethyl (trifluoromethyl) carbonate  
5-1

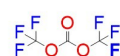

bis(trifluoromethyl) carbonate  
6-1

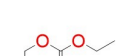

ethyl (fluoromethyl) carbonate  
7-1

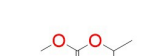

1-fluoroethyl methyl carbonate  
7-2

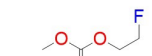

2-fluoroethyl methyl carbonate  
7-3

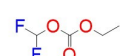

difluoromethyl ethyl carbonate  
8-1

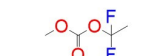

1,1-difluoroethyl methyl carbonate  
8-2

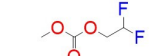

2,2-difluoroethyl methyl carbonate  
8-3

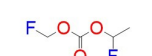

1-fluoroethyl carbonate  
8-4

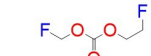

2-fluoroethyl carbonate  
8-5

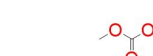

1,2-difluoroethyl methyl carbonate  
8-6

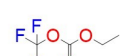

ethyl (trifluoromethyl) carbonate  
9-1

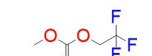

2,2,2-trifluoroethyl carbonate  
9-2

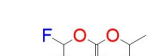

difluoromethyl carbonate  
9-3

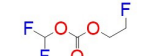

difluoromethyl carbonate  
9-4

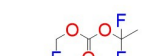

1,1-difluoroethyl carbonate  
9-5

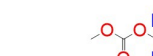

1,1,2-trifluoroethyl carbonate  
9-6

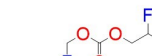

2,2-difluoroethyl carbonate  
9-7

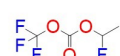

1-fluoroethyl (trifluoromethyl) carbonate  
10-1

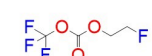

2-fluoroethyl (trifluoromethyl) carbonate  
10-2

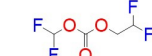

2,2-difluoroethyl (difluoromethyl) carbonate  
10-3

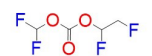

1,2-difluoroethyl (difluoromethyl) carbonate  
10-4

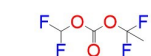

1,1-difluoroethyl (difluoromethyl) carbonate  
10-5

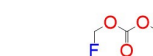

fluoromethyl (1,1,2-trifluoroethyl) carbonate  
10-6

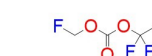

fluoromethyl (1,1,2-trifluoroethyl) carbonate  
10-7

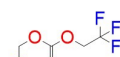

fluoromethyl (2,2,2-trifluoroethyl) carbonate  
10-8

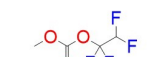

methyl (1,1,2,2-tetrafluoroethyl) carbonate  
10-9

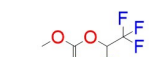

methyl (1,2,2,2-tetrafluoroethyl) carbonate  
10-10

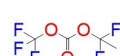

1,1-difluoroethyl (trifluoromethyl) carbonate  
11-1

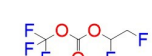

1,2-difluoroethyl (trifluoromethyl) carbonate  
11-2

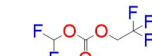

difluoromethyl (2,2,2-trifluoroethyl) carbonate  
11-3

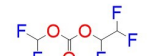

difluoromethyl (1,2,2-trifluoroethyl) carbonate  
11-4

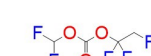

difluoromethyl (1,1,2-trifluoroethyl) carbonate  
11-5

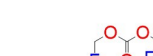

fluoromethyl (1,1,2,2-tetrafluoroethyl) carbonate  
11-6

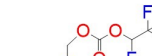

fluoromethyl (1,2,2,2-tetrafluoroethyl) carbonate  
11-7

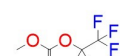

methyl (perfluoroethyl) carbonate  
11-8

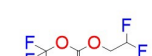

2,2-difluoroethyl (trifluoromethyl) carbonate  
11-9

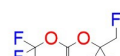

1,1,2-trifluoroethyl (trifluoromethyl) carbonate  
12-1

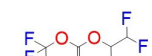

1,2,2-trifluoroethyl (trifluoromethyl) carbonate  
12-2

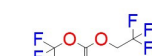

2,2,2-trifluoroethyl (trifluoromethyl) carbonate  
12-3

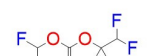

difluoromethyl (1,1,2,2-tetrafluoroethyl) carbonate  
12-4

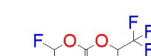

difluoromethyl (1,2,2,2-tetrafluoroethyl) carbonate  
12-5

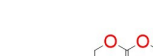

fluoromethyl (perfluoroethyl) carbonate  
12-6

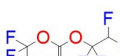

1,1,2,2-tetrafluoroethyl (trifluoromethyl) carbonate  
13-1

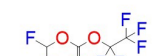

difluoromethyl (perfluoroethyl) carbonate  
13-2

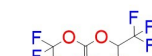

1,2,2,2-tetrafluoroethyl (trifluoromethyl) carbonate  
13-3

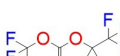

perfluoroethyl (trifluoromethyl) carbonate  
14-1
