# Supplementary material
Source: Royal Society of Chemistry journal article supplement (doi:10.1039/d6ta02519f)
Supplement: d6ta02519f4.xlsx [file d6ta02519f4.xlsx]

## Sheet: Sheet1
molecule	α1	α2	α1+α2	α1-α2	β1	β2	β1+β2	β1-β2	α+β	γ1	γ2	γ1+γ2	γ1-γ2	Ox/V	Red/V	Homo/eV	Lumo/eV	Li+ Binding Energy/eV	Dipole moment/D	Volume/Angstrom^3	Overall surface area/Angstrom^2	S_vdW/Angstrom^-1	ESPmin/eV	ESPmax/eV	ESW/eV
DMC	0	0	0	0	0	0	0	0	0	0	0	0	0	7.07017	-0.463221	-10.4658	0.512391	-1.86683	0.4012	112.076	128.544	1.14693	-1.59359	0.940434	7.53339
EMC	0	0	0	0	0	0	0	0	0	1	0	1	-1	6.90626	-0.490887	-10.3969	0.548582	-1.93057	0.6298	135.73	151.051	1.11288	-1.6361	0.909298	7.39714
DEC	0	0	0	0	0	0	0	0	0	1	1	2	0	6.84065	-0.495442	-10.299	0.587222	-1.94879	0.6623	159.421	173.544	1.08859	-1.67607	0.792471	7.33609
1-1	1	0	1	1	0	0	0	0	1	0	0	0	0	7.16403	-0.130001	-10.7994	0.536337	-1.6925	2.6969	116.75	133.877	1.1467	-1.45839	1.26702	7.29403
2-1	2	0	2	2	0	0	0	0	2	0	0	0	0	7.54353	0.625929	-11.065	0.471574	-1.47135	3.6796	121.814	139.596	1.14598	-1.09402	1.34271	6.9176
2-2	1	1	2	0	0	0	0	0	2	0	0	0	0	7.41473	0.148897	-11.1042	0.527085	-1.5468	4.33	121.432	139.243	1.14668	-1.36439	1.47983	7.26583
3-1	3	0	3	3	0	0	0	0	3	0	0	0	0	7.53338	1.2461	-11.1893	0.385858	-1.53032	3.9758	126.701	143.503	1.13261	-1.35273	1.39445	6.28728
3-2	2	1	3	1	0	0	0	0	3	0	0	0	0	7.60177	0.58604	-11.3662	0.473478	-1.37031	3.7637	126.603	144.961	1.14501	-1.02001	1.7336	7.01573
4-1	3	1	4	2	0	0	0	0	4	0	0	0	0	7.76447	1.194	-11.5172	0.402729	-1.42972	3.4133	131.437	148.863	1.13257	-1.15513	1.73824	6.57047
4-2	2	2	4	0	0	0	0	0	4	0	0	0	0	7.79045	0.659227	-11.6266	0.412253	-1.17344	2.9178	131.744	150.663	1.1436	-0.675656	1.98986	7.13122
5-1	3	2	5	1	0	0	0	0	5	0	0	0	0	7.7924	1.33548	-11.7855	0.351027	-1.26493	1.3061	136.603	154.655	1.13215	-0.854616	1.97979	6.45693
6-1	3	3	6	0	0	0	0	0	6	0	0	0	0	8.1271	1.36679	-11.9499	0.259597	-1.24065	1.244	141.495	158.624	1.12106	-0.904023	1.83976	6.76031
7-1	0	1	1	-1	0	0	0	0	1	1	0	1	-1	7.09014	-0.141588	-10.711	0.575793	-1.77533	2.9732	140.378	156.439	1.11441	-1.50074	1.23198	7.23172
7-2	1	0	1	1	0	0	0	0	1	1	0	1	-1	7.07663	-0.198223	-10.7305	0.526813	-2.54201	2.7374	140.302	155.429	1.10782	-1.54679	1.08554	7.27485
7-3	0	0	0	0	1	0	1	1	1	1	0	1	-1	6.9331	-0.415799	-10.542	0.506404	-1.76189	2.2731	140.308	156.277	1.11381	-1.46342	1.44703	7.3489
8-1	0	2	2	-2	0	0	0	0	2	1	0	1	-1	7.2752	0.640207	-10.871	0.507493	-1.52685	4.0444	145.498	162.186	1.11469	-1.13599	1.29095	6.63499
8-2	2	0	2	2	0	0	0	0	2	1	0	1	-1	7.16578	0.580105	-10.7711	0.476199	-1.88764	3.4025	144.849	158.779	1.09617	-1.93324	1.16936	6.58567
8-3	0	0	0	0	2	0	2	2	2	1	0	1	-1	7.06247	-0.307874	-10.669	0.4196	-1.66041	2.3778	144.971	160.863	1.10962	-1.49714	1.85065	7.37035
8-4	1	1	2	0	0	0	0	0	2	1	0	1	-1	7.33962	0.0973938	-11.0356	0.53035	-1.69727	4.7006	145.012	160.811	1.10895	-1.45791	1.42744	7.24222
8-5	0	1	1	-1	1	0	1	1	2	1	0	1	-1	7.20781	-0.0906287	-10.868	0.530894	-1.6886	4.457	144.985	161.671	1.11508	-1.37026	1.66145	7.29843
8-6	1	0	1	1	1	0	1	1	2	1	0	1	-1	7.20988	-0.087211	-10.8734	0.42858	-1.64437	3.802	144.919	160.609	1.10827	-1.48621	1.83583	7.29709
9-1	0	3	3	-3	0	0	0	0	3	1	0	1	-1	7.26399	1.24974	-10.9719	0.424226	-1.67603	4.4508	150.358	166.081	1.10457	-1.40447	1.24492	6.01425
9-2	0	0	0	0	3	0	3	3	3	1	0	1	-1	7.23018	-0.215951	-10.7901	0.387218	-0.947074	2.9688	149.928	165.736	1.10544	-1.18683	1.26205	7.44614
9-3	1	2	3	-1	0	0	0	0	3	1	0	1	-1	7.51492	0.429642	-11.2897	0.501778	-1.42712	2.8022	150.135	166.512	1.10908	-1.02456	1.43516	7.08527
9-4	0	2	2	-2	1	0	1	1	3	1	0	1	-1	7.39953	0.720026	-11.1224	0.470213	-1.41714	3.8771	150.084	167.372	1.11519	-1.11331	1.79502	6.6795
9-5	2	1	3	1	0	0	0	0	3	1	0	1	-1	7.10043	0.717579	-11.075	0.500146	-1.83084	4.1503	149.528	164.167	1.0979	-1.70684	1.49146	6.38285
9-6	2	0	2	2	1	0	1	1	3	1	0	1	-1	7.34577	0.858295	-10.9382	0.437015	-1.87333	5.3953	149.739	164.34	1.09751	-1.7324	1.35807	6.48748
9-7	1	0	1	1	2	0	2	2	3	1	0	1	-1	7.34654	0.0339314	-11.0225	0.410348	-1.55894	5.0876	149.91	165.768	1.10578	-1.17271	1.97147	7.31261
9-8	0	1	1	-1	2	0	2	2	3	1	0	1	-1	7.31226	0.0164181	-10.9978	0.437287	-1.46181	3.1298	149.676	166.271	1.11088	-1.24772	2.04492	7.29584
10-1	1	3	4	-2	0	0	0	0	4	1	0	1	-1	7.69097	1.29466	-11.4418	0.405994	-1.51601	4.2148	154.991	170.471	1.09988	-1.24563	1.55255	6.39631
10-2	0	3	3	-3	1	0	1	1	4	1	0	1	-1	7.37035	1.31073	-11.281	0.388307	-1.01732	4.4211	154.932	171.36	1.10603	-1.25489	1.89561	6.05962
10-3	0	2	2	-2	2	0	2	2	4	1	0	1	-1	7.5415	0.682665	-11.2865	0.444362	-1.31133	1.4355	154.988	172.509	1.11305	-0.840646	1.77279	6.85883
10-4	1	2	3	-1	1	0	1	1	4	1	0	1	-1	7.64661	0.520305	-11.4348	0.376334	-1.3109	5.3564	154.786	171.764	1.10969	-1.19413	2.24323	7.12631
10-5	2	2	4	0	0	0	0	0	4	1	0	1	-1	7.61082	-0.305207	-11.3303	0.453614	-1.54116	3.2678	154.638	169.925	1.09886	-1.4027	1.56275	7.91603
10-6	1	1	2	0	2	0	2	2	4	1	0	1	-1	7.58089	0.32392	-11.3099	0.446539	-1.41888	3.1512	154.541	171.113	1.10723	-1.09486	2.04929	7.25697
10-7	2	1	3	1	1	0	1	1	4	1	0	1	-1	7.57979	0.446162	-11.2356	0.452253	-1.16562	5.1712	154.456	169.774	1.09917	-1.50831	1.6686	7.13363
10-8	0	1	1	-1	3	0	3	3	4	1	0	1	-1	7.44348	0.107171	-11.1145	0.403817	-1.53899	2.5754	154.645	171.151	1.10674	-1.07069	1.5064	7.33631
10-9	2	0	2	2	2	0	2	2	4	1	0	1	-1	7.4457	1.04686	-11.0565	0.411436	-1.61791	4.8512	154.709	169.172	1.09349	-1.52362	1.69463	6.39884
10-10	1	0	1	1	3	0	3	3	4	1	0	1	-1	7.43736	0.142184	-11.111	0.393205	-1.41324	4.0049	154.862	170.547	1.10129	-1.01745	1.46562	7.29517
11-1	2	3	5	-1	0	0	0	0	5	1	0	1	-1	7.78385	1.32877	-11.49	0.374429	-1.59277	4.5107	159.533	173.899	1.09005	-1.40153	1.37404	6.45509
11-2	1	3	4	-2	1	0	1	1	5	1	0	1	-1	7.85812	1.29818	-11.6165	0.370347	-1.37985	3.0918	159.82	176.271	1.10294	-1.04078	1.94621	6.55994
11-3	0	2	2	-2	3	0	3	3	5	1	0	1	-1	7.63747	0.562502	-11.3877	0.35402	-1.18731	2.9564	159.788	176.964	1.10749	-0.754561	1.74777	7.07497
11-4	1	2	3	-1	2	0	2	2	5	1	0	1	-1	7.68329	0.515021	-11.3687	0.446811	-1.53596	1.2674	159.438	175.482	1.10062	-1.3153	2.10696	7.16827
11-5	2	2	4	0	1	0	1	1	5	1	0	1	-1	7.77271	0.710202	-11.4829	0.412525	-1.42755	2.8552	159.62	175.545	1.09977	-1.20859	1.82459	7.0625
11-6	2	1	3	1	2	0	2	2	5	1	0	1	-1	7.67497	0.96446	-11.3452	0.439464	-1.56501	3.6538	159.467	174.619	1.09502	-1.30227	1.80264	6.71051
11-7	1	1	2	0	3	0	3	3	5	1	0	1	-1	7.6514	-1.67107	-11.382	0.363272	-1.173	3.1146	159.757	176.515	1.10489	-0.802958	1.69968	9.32247
11-8	2	0	2	2	3	0	3	3	5	1	0	1	-1	7.53571	1.23312	-11.1855	0.37334	-1.57672	4.1492	159.755	173.734	1.0875	-1.34381	1.41434	6.30259
11-9	0	3	3	-3	2	0	2	2	5	1	0	1	-1	7.70075	1.33891	-11.422	-0.41975	-1.41844	4.0922	159.669	175.977	1.10214	-1.1141	2.31067	6.36184
12-1	2	3	5	-1	1	0	1	1	6	1	0	1	-1	7.94672	1.23887	-11.6389	0.342592	-1.44056	3.9857	164.486	179.532	1.09147	-1.21343	1.7043	6.70786
12-2	1	3	4	-2	2	0	2	2	6	1	0	1	-1	7.94872	1.19474	-11.7268	0.277012	-1.21637	3.1264	164.689	180.95	1.09874	-0.891636	2.48147	6.75398
12-3	0	3	3	-3	3	0	3	3	6	1	0	1	-1	7.82964	1.29161	-11.5461	0.284631	-1.21767	1.6317	164.663	180.921	1.09874	-0.970742	1.73278	6.53803
12-4	2	2	4	0	2	0	2	2	6	1	0	1	-1	7.8864	0.786373	-11.5918	0.395926	-1.29572	1.3457	164.645	180.389	1.09563	-1.01074	1.92145	7.10003
12-5	1	2	3	-1	3	0	3	3	6	1	0	1	-1	7.86451	0.71552	-11.6968	0.371163	-1.06806	1.9089	164.78	181.725	1.10283	-0.535648	1.89376	7.14899
12-6	2	1	3	1	3	0	3	3	6	1	0	1	-1	7.77694	1.16695	-11.4745	0.380143	-1.43709	3.5235	164.503	179.168	1.08915	-1.14492	1.7619	6.60999
13-1	2	3	5	-1	2	0	2	2	7	1	0	1	-1	8.06251	1.25807	-11.7472	0.223406	-1.258	3.0495	169.518	184.387	1.08771	-1.03776	2.03836	6.80444
13-2	2	2	4	0	3	0	3	3	7	1	0	1	-1	7.97392	1.33385	-11.7333	0.319462	-1.14698	1.4005	169.696	184.958	1.08994	-0.849284	2.00815	6.64008
13-3	1	3	4	-2	3	0	3	3	7	1	0	1	-1	7.931	1.4973	-11.7695	0.215242	-1.29052	2.9608	169.494	185.009	1.09154	-1.14743	2.26324	6.43371
14-1	2	3	5	-1	3	0	3	3	8	1	0	1	-1	8.17078	1.34261	-11.8944	0.156193	-1.13137	1.254	174.555	188.984	1.08266	-0.888665	1.86587	6.82818
15-1	1	0	1	1	0	0	0	0	1	1	1	2	0	7.00911	-0.20914	-10.6682	0.564909	-1.89979	2.9346	163.94	177.967	1.08556	-1.59135	0.978223	7.21825
15-2	0	0	0	0	1	0	1	1	1	1	1	2	0	6.95101	-0.472862	-10.4696	0.542867	-1.83821	2.2792	163.952	178.78	1.09044	-1.50434	1.41442	7.42388
16-1	0	0	0	0	2	0	2	2	2	1	1	2	0	6.99257	-0.32847	-10.5665	0.453342	-1.7285	2.3209	168.633	183.395	1.08754	-1.53842	1.81592	7.32104
16-2	2	0	2	2	0	0	0	0	2	1	1	2	0	7.10275	0.620799	-10.7156	0.516472	-2.00516	3.6926	168.482	181.316	1.07618	-1.98253	0.986581	6.48195
16-3	1	1	2	0	0	0	0	0	2	1	1	2	0	7.2059	-0.792397	-10.9613	0.565453	-1.75798	1.9443	168.555	182.35	1.08185	-1.39348	1.10883	7.9983
16-4	0	0	0	0	1	1	2	0	2	1	1	2	0	6.90174	-0.314549	-10.6214	0.502595	-1.69858	1.9805	168.542	184.047	1.09199	-1.36672	1.47327	7.21629
16-5	1	0	1	1	0	1	1	-1	2	1	1	2	0	7.12065	-0.129693	-10.7939	0.522187	-1.75712	0.7983	168.526	183.19	1.08701	-1.43029	1.55422	7.25035
16-6	1	0	1	1	1	0	1	1	2	1	1	2	0	7.1276	-0.110512	-10.749	0.45824	-1.70118	3.9187	168.58	183.178	1.08659	-1.52235	1.79356	7.23811
17-1	3	0	3	3	0	0	0	0	3	1	1	2	0	7.12311	-0.267021	-10.6573	0.4196	-1.58756	3.2532	173.595	188.259	1.08447	-1.23045	1.22188	7.39013
17-2	2	0	2	2	1	0	1	1	3	1	1	2	0	7.27002	0.89118	-10.8609	0.47239	-1.88807	5.8214	173.394	186.929	1.07806	-1.78508	1.33087	6.37884
17-3	1	0	1	1	2	0	2	2	3	1	1	2	0	7.27229	0.0376757	-10.8418	0.439736	-1.63265	5.4115	173.585	188.335	1.08498	-1.20975	1.92698	7.23461
17-4	0	0	0	0	2	1	3	1	3	1	1	2	0	7.11008	-0.16029	-10.745	0.417151	-1.66691	4.1322	173.21	188.65	1.08914	-1.49677	1.90284	7.27037
17-5	0	1	1	-1	2	0	2	2	3	1	1	2	0	7.23952	-0.0359692	-10.9246	0.43375	-1.10535	2.9129	173.223	187.831	1.08433	-1.31061	1.9865	7.27549
17-6	2	0	2	2	0	1	1	-1	3	1	1	2	0	7.22663	0.103242	-10.841	0.476744	-1.96352	3.0993	173.052	186.586	1.0782	-1.83292	1.64123	7.12338
17-7	2	1	3	1	0	0	0	0	3	1	1	2	0	7.32639	0.436597	-11.0013	0.497696	-1.96482	4.5475	173.067	185.739	1.07322	-1.79467	1.22236	6.88979
17-8	1	0	1	1	1	1	2	0	3	1	1	2	0	7.32996	0.145079	-11.0329	0.489261	-1.46874	3.7427	173.348	189.342	1.09227	-1.22043	1.57274	7.18488
17-9	1	1	2	0	1	0	1	1	3	1	1	2	0	7.41309	0.315795	-11.1425	0.482186	-0.943167	5.8384	173.38	188.098	1.08489	-1.34764	1.62308	7.0973
18-1	2	2	4	0	0	0	0	0	4	1	1	2	0	7.41965	0.540009	-11.0457	0.454702	-1.93313	5.8814	177.612	189.154	1.06498	-1.82082	1.20247	6.87964
18-2	1	1	2	0	1	1	2	0	4	1	1	2	0	7.56558	0.34877	-11.3199	0.442185	-1.52248	5.3251	178.167	193.876	1.08817	-1.1434	1.95263	7.21681
18-3	2	1	3	1	0	1	1	-1	4	1	1	2	0	7.49672	0.486792	-11.1828	0.468036	-1.72933	5.5968	177.871	191.501	1.07663	-1.57964	1.61003	7.00993
18-4	2	0	2	2	1	1	2	0	4	1	1	2	0	7.43848	0.874878	-11.0584	1.41336	-1.7922	4.8461	178.039	192.599	1.08178	-1.58424	1.49976	6.5636
18-5	1	1	2	0	2	0	2	2	4	1	1	2	0	7.51221	0.325989	-11.2544	0.490077	-1.542	4.0577	178.262	193.128	1.08339	-1.20115	1.4722	7.18622
18-6	2	0	2	2	2	0	2	2	4	1	1	2	0	7.37634	1.88468	-10.9254	0.446811	-1.68943	5.2897	178.357	191.747	1.07508	-1.5752	1.66415	5.49166
18-7	0	0	0	0	2	2	4	0	4	1	1	2	0	7.21256	-0.0774639	-10.8739	0.340687	-1.46785	5.0766	177.907	193.274	1.08638	-1.5138	1.97154	7.29003
18-8	2	1	3	1	1	0	1	1	4	1	1	2	0	7.49216	0.400213	-11.1602	0.454158	-1.68466	5.8451	178.005	191.365	1.07505	-1.59777	1.495	7.09195
18-9	1	0	1	1	3	0	3	3	4	1	1	2	0	7.40262	0.138891	-10.9031	0.428307	-1.46004	4.3772	177.939	192.693	1.08291	-1.10883	1.41322	7.26372
18-10	0	1	1	-1	3	0	3	3	4	1	1	2	0	7.34029	0.0531018	-11.0437	0.403273	-1.58102	3.0827	178.226	192.732	1.08139	-1.16257	1.46551	7.28719
18-11	1	0	1	1	2	1	3	1	4	1	1	2	0	7.43188	0.156181	-11.108	0.395926	-1.42405	3.5923	178.211	194.023	1.08873	-1.03593	2.13279	7.2757
18-12	2	0	2	2	0	2	2	-2	4	1	1	2	0	7.32946	-1.04487	-10.9899	0.452526	-1.70764	3.5969	177.916	191.711	1.07753	-1.66749	1.64796	8.37433
18-13	1	0	1	1	1	2	3	-1	4	1	1	2	0	8.61358	0.149531	-11.1325	0.464499	-1.4943	4.2524	178.192	194.077	1.08914	-1.10653	1.81063	8.46405
18-14	0	0	0	0	3	1	4	2	4	1	1	2	0	7.2255	-0.134325	-10.8669	0.387218	-1.47695	4.1851	178.179	193.543	1.08622	-1.25621	1.68053	7.35982
19-1	2	1	3	1	1	1	2	0	5	1	1	2	0	7.63453	0.619912	-11.3074	0.433205	-1.59494	3.6517	182.76	197.006	1.07795	-1.32406	1.67557	7.01461
19-2	2	2	4	0	1	0	1	1	5	1	1	2	0	7.04295	0.827432	-11.2032	0.418239	-1.79354	6.911	182.541	194.759	1.06693	-1.6341	1.55505	6.21551
19-3	2	0	2	2	2	1	3	1	5	1	1	2	0	7.14578	1.507	-11.1716	0.403817	-1.59103	3.9284	182.542	194.759	1.06693	-1.63413	1.55502	5.63878
19-4	2	0	2	2	1	2	3	-1	5	1	1	2	0	6.92398	0.934149	-11.155	0.41579	-1.55287	4.0754	182.851	197.311	1.07908	-1.47018	1.83608	5.98983
19-5	2	1	3	1	3	0	3	3	6	1	1	2	0	7.61495	1.08383	-11.2699	0.438648	-1.64784	4.4062	201.825	204.941	1.01544	-1.39398	1.75836	6.53113
19-6	1	0	1	1	2	2	4	0	5	1	1	2	0	7.53764	0.216386	-11.2451	0.379871	-1.34082	2.1301	183.033	198.745	1.08585	-0.96709	2.16032	7.32125
19-7	0	0	0	0	3	2	5	1	5	1	1	2	0	7.36193	-0.0191744	-11.0209	0.35783	-1.3586	2.4685	183.055	198.678	1.08535	-0.920777	1.67162	7.38111
19-8	1	1	2	0	2	1	3	1	5	1	1	2	0	7.61779	0.412978	-11.3779	0.349122	-1.40587	5.1164	182.732	197.902	1.08302	-1.31408	2.14492	7.20481
19-9	0	1	1	-1	3	1	4	2	5	1	1	2	0	7.51607	0.183123	-11.2266	0.370075	-1.36771	2.4062	183.028	198.483	1.08444	-1.0114	1.71685	7.33295
19-10	1	2	3	-1	2	0	2	2	5	1	1	2	0	7.63453	0.472435	-11.2938	0.472934	-1.67516	4.5076	182.805	196.536	1.07511	-1.47958	1.55005	7.16209
19-11	2	0	2	2	0	3	3	-3	5	1	1	2	0	7.04295	0.313156	-11.0848	0.365993	-1.69988	1.9187	182.748	196.117	1.07316	-1.54311	1.42814	6.72979
19-12	1	0	1	1	3	1	4	2	5	1	1	2	0	7.48843	0.218623	-11.1942	0.393477	-1.37898	4.3426	183.096	198.337	1.08324	-1.08947	1.83511	7.26981
19-13	1	1	2	0	3	0	3	3	5	1	1	2	0	7.59822	0.427982	-11.3621	0.377422	-1.38939	4.3373	183.132	197.574	1.07886	-1.04338	1.65865	7.17023
19-14	3	0	3	3	2	0	2	2	5	1	1	2	0	6.3709	-1.10877	-10.9866	0.412253	-1.61315	4.6329	183.426	196.33	1.07035	-1.39677	1.26493	7.47967
20-1	1	1	2	0	2	2	4	0	6	1	1	2	0	7.72471	0.5535	-11.5213	0.360007	-1.21246	0.5181	187.861	203.131	1.08128	-0.788469	2.30236	7.17121
20-2	2	2	4	0	1	1	2	0	6	1	1	2	0	7.75301	0.870273	-11.3594	0.382048	-1.61662	6.7234	187.498	200.44	1.06903	-1.4326	1.72679	6.88274
20-3	2	0	2	2	2	2	4	0	6	1	1	2	0	7.61575	1.13961	-11.2342	0.34885	-1.56154	2.9242	187.646	201.545	1.07407	-1.22634	2.20532	6.47614
20-4	2	1	3	1	1	2	3	-1	6	1	1	2	0	7.72612	0.592165	-11.4065	0.382048	-1.5017	0.9837	187.508	201.647	1.0754	-1.22028	2.10434	7.13395
20-5	2	1	3	1	2	1	3	1	6	1	1	2	0	7.6954	1.14178	-11.3942	0.350211	-1.5004	3.5464	187.627	201.326	1.07301	-1.19445	2.18636	6.55362
20-6	2	2	4	0	2	0	2	2	6	1	1	2	0	7.69418	1.20097	-11.2984	0.417967	-1.71549	3.0461	187.533	199.513	1.06388	-1.51785	1.80174	6.49321
20-7	1	0	1	1	2	3	5	-1	6	1	1	2	0	7.60428	0.304064	-11.3365	0.308033	-1.24759	3.9975	187.889	203.156	1.08125	-0.963925	2.25904	7.30021
20-8	0	0	0	0	3	3	6	0	6	1	1	2	0	7.45393	0.0738287	-11.1216	0.287897	-1.2606	3.2795	187.889	203.119	1.08106	-0.852397	1.53721	7.3801
20-9	1	0	1	1	3	2	5	1	6	1	1	2	0	7.55803	0.328824	-11.601	-0.0552391	-1.27664	4.3002	189.782	206.154	1.08627	-0.967118	2.20281	7.22921
20-10	2	0	2	2	1	3	4	-2	6	1	1	2	0	7.55578	0.859305	-11.6122	-0.18667	-1.67516	5.2073	189.182	202.764	1.07179	-1.44003	2.14425	6.69648
20-11	2	1	3	1	3	0	3	3	6	1	1	2	0	7.69444	1.18064	-11.8016	-0.432661	-1.49693	5.4123	190.138	203.514	1.07035	-1.24238	2.01563	6.5138
20-12	1	2	3	-1	3	0	3	3	6	1	1	2	0	7.67636	2.07508	-11.8097	-0.431029	-1.62356	3.7196	189.626	203.592	1.07365	-1.34887	2.12376	5.60128
20-13	2	0	2	2	3	1	4	2	6	1	1	2	0	7.15209	1.25152	-11.5243	-0.183133	-1.5481	2.8612	190.12	204.805	1.07724	-1.21802	1.76296	5.90056
20-14	1	1	2	0	3	1	4	2	6	1	1	2	0	7.73475	0.481782	-11.893	-0.369531	-1.24542	3.5348	189.931	206.144	1.08536	-1.13754	2.39957	7.25297
21-1	1	0	1	1	3	3	6	0	7	1	1	2	0	7.56744	0.496013	-11.3714	0.274563	-1.43319	2.9522	192.697	207.235	1.07544	-1.26416	1.9394	7.07143
21-2	2	2	4	0	3	0	3	3	7	1	1	2	0	7.80224	1.32203	-11.4421	0.360007	-1.63526	4.601	192.602	204.211	1.06027	-1.37661	1.39802	6.48021
21-3	2	1	3	1	3	1	4	2	7	1	1	2	0	7.79415	1.19003	-11.5363	0.304768	-1.405	4.3581	192.707	206.001	1.06899	-1.06081	2.31768	6.60411
21-4	2	0	2	2	3	2	5	1	7	1	1	2	0	7.75315	1.27622	-11.4018	0.351843	-1.39373	2.4249	192.919	206.779	1.07185	-1.08775	1.91462	6.47693
21-5	2	2	4	0	2	1	3	1	7	1	1	2	0	7.84282	1.08855	-11.4244	0.304768	-1.56415	2.2744	192.408	205	1.06544	-1.28926	1.86004	6.75427
21-6	1	2	3	-1	3	1	4	2	7	1	1	2	0	7.84406	0.678232	-11.5286	0.338782	-1.39112	2.4479	192.577	206.508	1.07234	-1.07204	1.72093	7.16583
21-7	1	1	2	0	3	2	5	1	7	1	1	2	0	7.85797	0.623455	-11.6587	0.317285	-1.18601	1.0834	192.932	208.413	1.08024	-0.682751	1.8614	7.23451
21-8	2	1	3	1	2	2	4	0	7	1	1	2	0	7.84961	0.741471	-11.5403	0.35266	-1.32131	1.9312	192.736	206.899	1.07349	-1.04824	1.90863	7.10814
21-9	2	0	2	2	2	3	5	-1	7	1	1	2	0	7.71568	1.17116	-11.3523	0.324632	-2.39457	1.7759	192.659	206.503	1.07186	-1.08675	1.8223	6.54452
22-1	2	0	2	2	3	3	6	0	8	1	1	2	0	7.75565	1.263	-11.9297	-0.430484	-1.36337	4.1232	199.869	212.693	1.06416	-1.02768	2.35294	6.49265
22-2	2	1	3	1	3	2	5	1	8	1	1	2	0	7.95496	1.21936	-12.1594	-0.735252	-1.20032	4.2236	200.118	214.495	1.07184	-1.02215	2.93605	6.7356
22-3	2	2	4	0	3	1	4	2	8	1	1	2	0	7.90294	1.29849	-12.1183	-0.871853	-0.616639	4.3764	199.992	212.939	1.06474	-1.12566	2.09555	6.60445
22-4	2	1	3	1	2	3	5	-1	8	1	1	2	0	7.93497	0.922696	-12.1439	-0.750763	-1.23328	3.2468	200.141	214.637	1.07243	-0.81669	2.41809	7.01227
22-5	1	1	2	0	3	3	6	0	8	1	1	2	0	7.91468	0.636922	-12.1874	-0.619059	-0.468333	4.0360	200.237	216.124	1.07934	-0.728133	2.48564	7.27775
22-6	2	2	4	0	2	2	4	0	8	1	1	2	0	7.9399	0.00501929	-12.1186	-0.882738	-1.42538	0.3683	199.982	213.188	1.06604	-1.09383	2.37349	7.93488
23-1	2	2	4	0	3	2	5	1	9	1	1	2	0	8.02693	1.20276	-12.2868	-1.00601	-1.30917	2.9568	205.353	218.146	1.0623	-0.929624	2.49893	6.82417
23-2	2	1	3	1	3	3	6	0	9	1	1	2	0	8.04725	1.15573	-12.3123	-0.871581	-1.1292	1.7722	205.489	219.587	1.06861	-0.657978	2.58209	6.89153
24-1	2	2	4	0	3	3	6	0	10	1	1	2	0	7.3081	0.0418254	-11.0707	0.351027	-1.23327	3.839	296.945	287.367	0.967742	-1.05666	2.01173	7.26628
