# Supplementary material
Source: Royal Society of Chemistry journal article supplement (doi:10.1039/d6ta02519f)

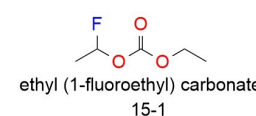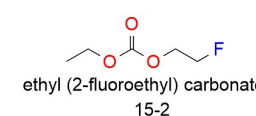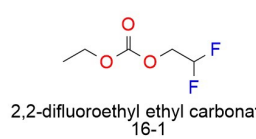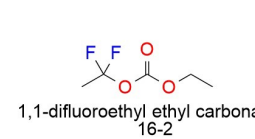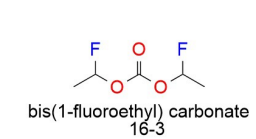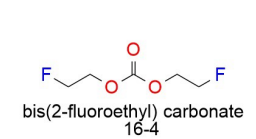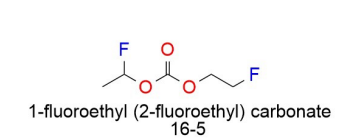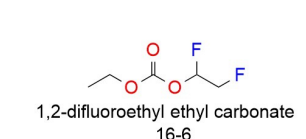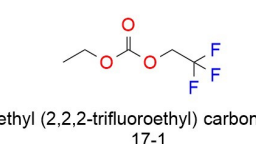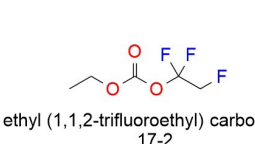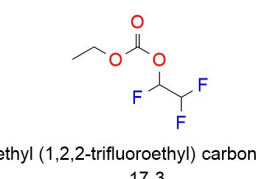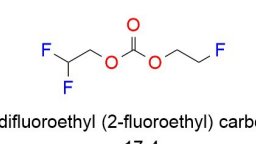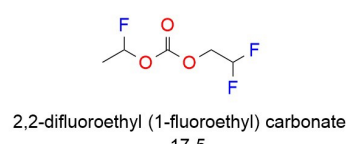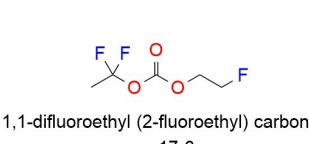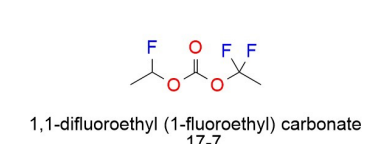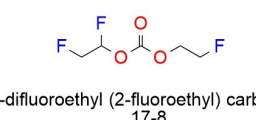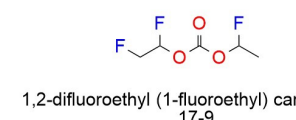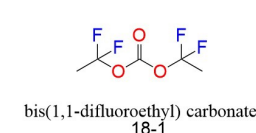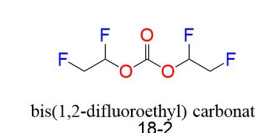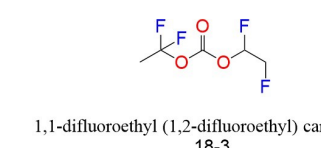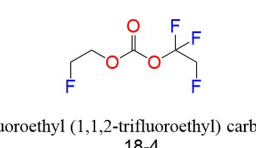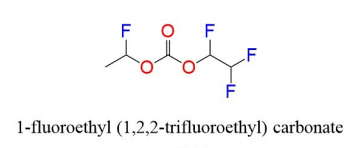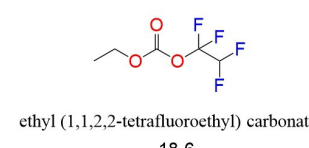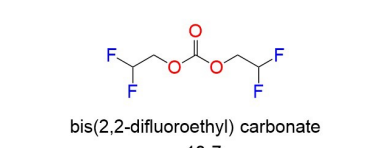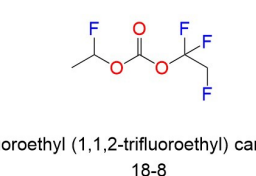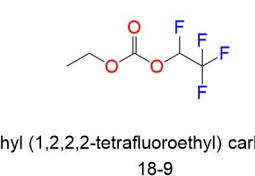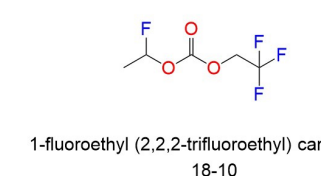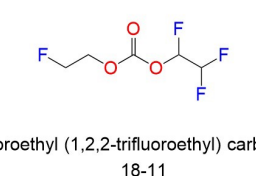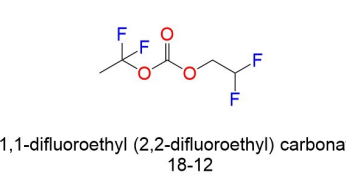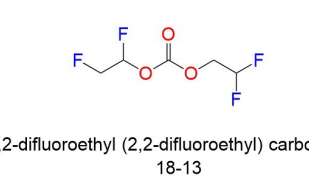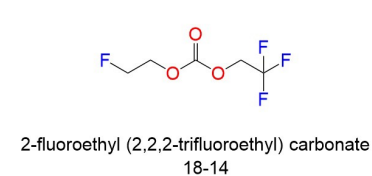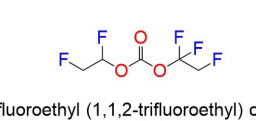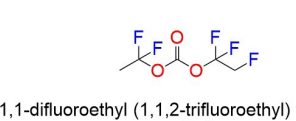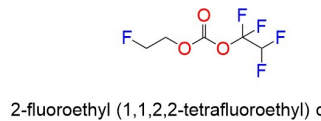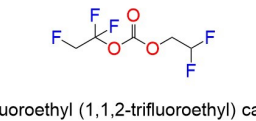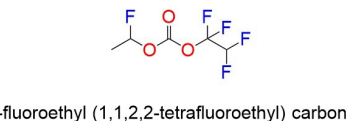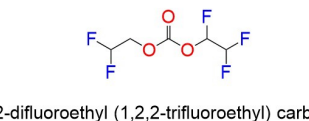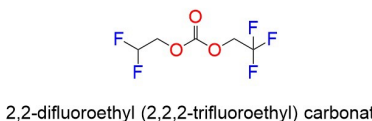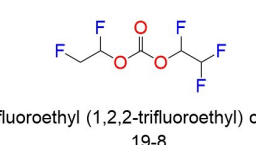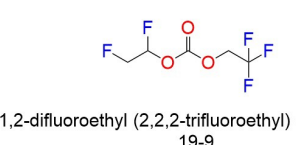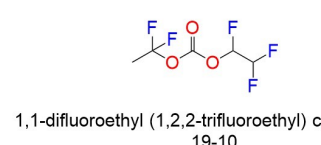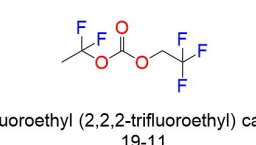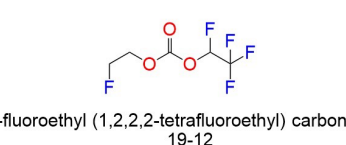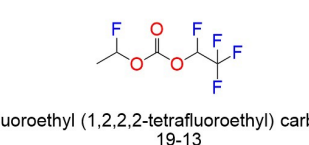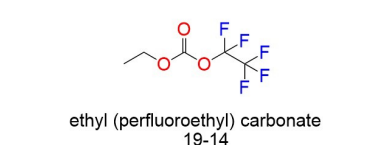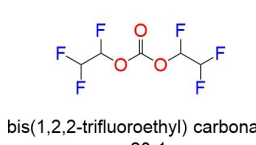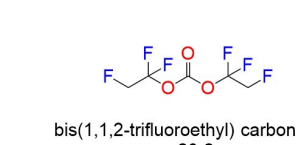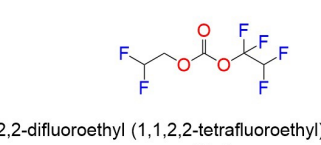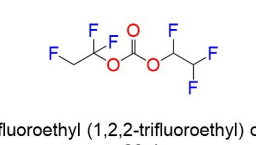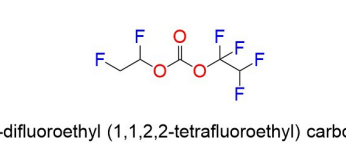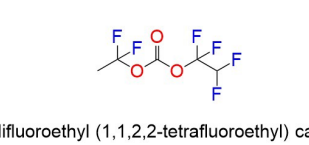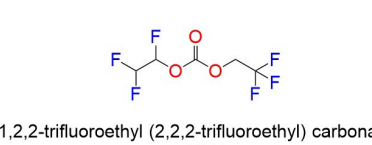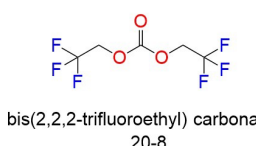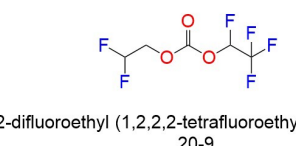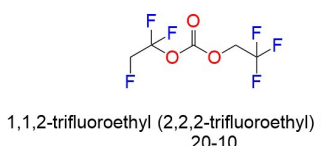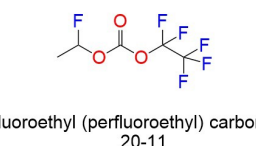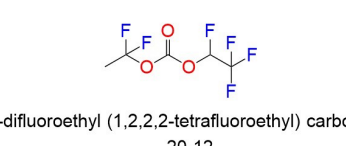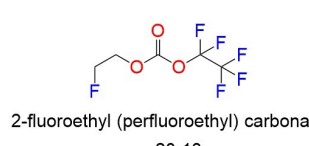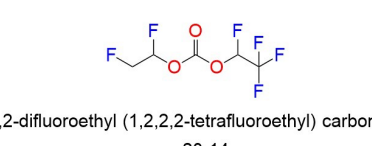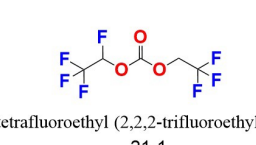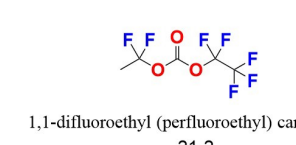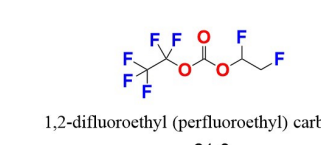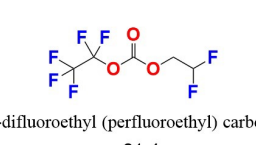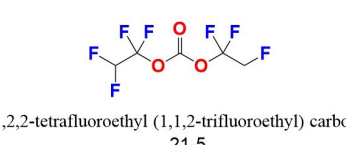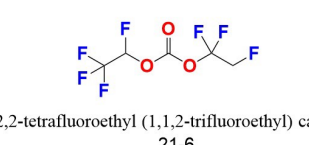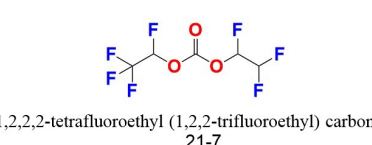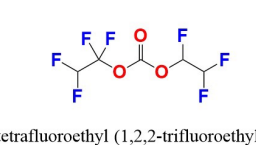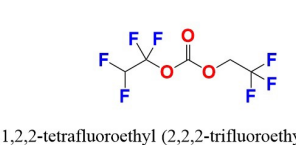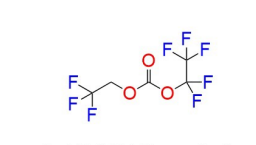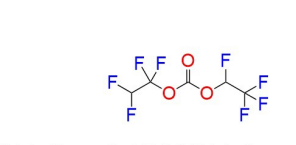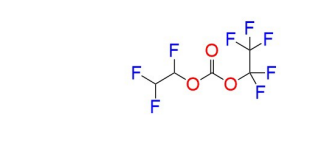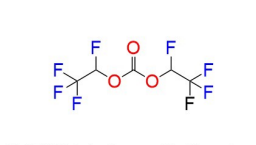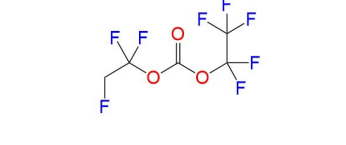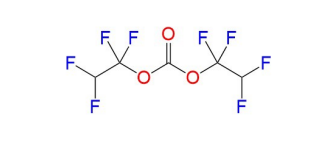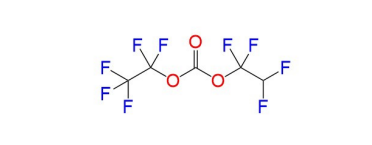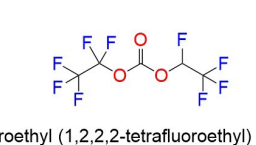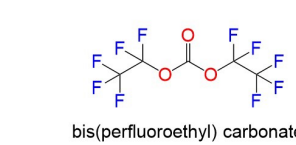

Supplement: d6ta02519f2.pdf [file d6ta02519f2.pdf]
